# Supplementary material for: Revisiting the Relationship Between Alzheimer’s Disease and Cancer With a circRNA Perspective
Source: Front Cell Dev Biol. 2021 Mar 11;9:647197. doi: 10.3389/fcell.2021.647197 (PMC7991802; doi:10.3389/fcell.2021.647197)
Supplement: Supplementary file 1 [file Table_1.XLSX]

## Sheet: Sheet1
Supplementary Table 1. Cancer samples used in this study
ABBR	SAMPLE TYPE	SAMPLE NUMBER
control	normal	25
ACC	Adrenocortical Carcinoma	24
ALL	Acute Lymphoblastic Leukemia	21
AML	Acute Myeloid Leukemia	10
BLCA	Bladder Urothelial Carcinoma	49
BRCA	Breast Invasive Ductal Carcinoma	236
CHOL	Intrahepatic Cholangiocarcinoma	62
COLO	Rectal Adenocarcinoma	29
ESCA	Esophageal Adenocarcinoma	19
GBM	Glioblastoma Multiforme	26
HCC	Hepatocellular Carcinoma	17
HNSC	Head and Neck Squamous Cell Carcinoma	49
JMML	Juvenile Myelomonocytic Leukemia	6
KDNY	Renal Cell Carcinoma	23
LUNG	Lung Adenocarcinoma	40
MBL	Medulloblastoma	7
MM	Multiple_Myeloma	212
MPN	Myelofibrosis	151
NHL	Non Hodgkin Lymphoma	124
NRBL	Neuroblastoma	13
OV	Ovarian Serous Adenocarcinoma	20
PAAD	Pancreatic Adenocarcinoma	58
PRAD	Prostate Adenocarcinoma	340
RHABDO	Rhabdomyosarcoma	10
SARC	Sarcoma	167
SECR	Adenoid Cystic Carcinoma	44
SKCM	Skin Cutaneous Melanoma	31
STAD	Stomach adenocarcinoma	27
THCA	Thyroid carcinoma	13
