# Supplementary material for: Revisiting the Relationship Between Alzheimer’s Disease and Cancer With a circRNA Perspective
Source: Front Cell Dev Biol. 2021 Mar 11;9:647197. doi: 10.3389/fcell.2021.647197 (PMC7991802; doi:10.3389/fcell.2021.647197)
Supplement: Supplementary file 2 [file Table_2.XLSX]

## Sheet: Sheet1
Supplementary Table 5. Differentially expressed circRNAs selected from TLE datasets
TLE1			TLE2
Name	Log2FC	P-value	Name	Log2FC	P-value
circATXN10	-2.91983	0.034725	circCAMSAP1	3.78	0.011
circCARM1	2.11013	0.045338	circNMD3	3.37	0.008
circCEP112	3.17545	0.000968	circBNIP3L	2.63	0.008
circCPO	-3.82572	0.02325	circFBXL4	2.68	0.01
circCPS1	3.73845	0.026479	circTLL1	2.56	0.019
circDTWD2	-2.20952	0.015935	circAC067956.1	-2.95	0.019
circEIF3H	-3.2346	0.00695	circRPS6KC1	2.43	0.02
circELMO2	1.99834	0.03003	circNCAM1	2.3	0.03
circGPR107	-3.51693	0.044478	circHOMER1	-0.61	0.03
circGRIN2A	2.10505	0.022681
circHEATR6	-2.79157	0.036337
circHHAT	-2.46284	0.027915
circHTR4	-3.10129	0.04958
circLAMC3	1.69042	0.037695
circLRP1B	-1.73885	0.015088
circMAPKAPK5	1.94294	0.00518
circMBP	-3.67141	0.003141
circMCF2L2	-2.06287	0.023618
circNTM	4.56381	0.039719
circPBX1	2.88726	0.00149
circPBX3	-3.58704	0.034244
circPGAP1	-4.48677	0.049691
circRHEB	1.95991	0.015275
circRYR2	3.25842	0.046906
circSLC30A7	-2.42895	0.020708
circSPECC1	3.60108	0.011025
circSSH2	1.51479	0.000955
circTBCE	-2.67111	0.046143
circTXNL1	-2.12936	0.03754
circUSP32	5.00307	0.015067
circXPO6	-3.85108	0.029757
circZNF568	-3.54567	0.042068
