# Supplementary material for: Revisiting the Relationship Between Alzheimer’s Disease and Cancer With a circRNA Perspective
Source: Front Cell Dev Biol. 2021 Mar 11;9:647197. doi: 10.3389/fcell.2021.647197 (PMC7991802; doi:10.3389/fcell.2021.647197)
Supplement: Supplementary file 3 [file Table_3.XLSX]

## Sheet: Sheet1
Supplementary Table 6. Candidate circRNAs in TLE are not correlated with any cancers
	TLE		TLE 2
cancers	estimate	p.value	estimate	p-value
ACC	0.0680215	0.711451	-0.184742	0.634187
ALL	-0.0138354	0.940092	-0.345093	0.363065
AML	0.0440119	0.810967	-0.50204	0.168453
BLCA	-0.0246162	0.893616	-0.230783	0.550222
BRCA	0.0351076	0.848717	-0.0928891	0.812123
CHOL	-0.0441741	0.810283	-0.302222	0.429276
COLO	-0.0776467	0.672734	-0.0382641	0.922144
ESCA	0.0854664	0.641868	-0.388677	0.301222
GBM	0.125563	0.493503	0.196844	0.611716
HCC	-0.113426	0.536506	-0.050946	0.896438
HNSC	0.0505919	0.783331	-0.23087	0.550067
JMML	-0.0689859	0.707538	-0.364891	0.334265
KDNY	-0.0446728	0.80818	-0.157105	0.686457
LUNG	0.0309602	0.866419	-0.0907354	0.816419
MBL	-0.140213	0.444032	-0.120962	0.756563
MM	0.163813	0.37032	-0.311349	0.414755
MPN	0.0589314	0.748679	-0.351955	0.352952
NHL	0.190296	0.296848	-0.314805	0.409314
NRBL	-0.141538	0.439695	-0.312797	0.412471
OV	-0.133033	0.467936	0.0636037	0.870864
PAAD	0.192952	0.29003	-0.395264	0.29238
PRAD	0.0547314	0.766075	-0.18737	0.629284
RHABDO	-0.140089	0.444441	-0.136696	0.725825
SARC	-0.0852194	0.642835	-0.235653	0.541597
SECR	0.128052	0.484904	-0.137931	0.723425
SKCM	0.0533258	0.771923	0.266449	0.488292
STAD	0.075599	0.680906	-0.0827844	0.832313
THCA	0.074992	0.683335	0.01249	0.974559
