# Supplementary material for: Revisiting the Relationship Between Alzheimer’s Disease and Cancer With a circRNA Perspective
Source: Front Cell Dev Biol. 2021 Mar 11;9:647197. doi: 10.3389/fcell.2021.647197 (PMC7991802; doi:10.3389/fcell.2021.647197)
Supplement: Supplementary file 4 [file Table_4.XLSX]

## Sheet: new 16
Supplementary Table 7. GO functional categories and KEGG pathways that enriched with circRNA-regulated mRNAs
Term	Overlap	P-value	Adjusted P-value
cellular response to interleukin-12 (GO:0071349)	13/46	6.76E-12	1.73E-08
interleukin-12-mediated signaling pathway (GO:0035722)	13/46	6.76E-12	3.45E-08
cellular macromolecule biosynthetic process (GO:0034645)	29/367	1.04E-09	1.33E-06
gene expression (GO:0010467)	31/411	8.53E-10	1.45E-06
viral process (GO:0016032)	22/220	1.54E-09	1.57E-06
regulation of translation (GO:0006417)	21/213	4.70E-09	3.42E-06
translation (GO:0006412)	22/232	4.16E-09	3.54E-06
viral gene expression (GO:0019080)	15/110	9.82E-09	6.26E-06
viral transcription (GO:0019083)	15/113	1.43E-08	8.09E-06
peptide biosynthetic process (GO:0043043)	17/174	1.59E-07	7.38E-05
nuclear-transcribed mRNA catabolic process (GO:0000956)	17/174	1.59E-07	8.12E-05
cytokine-mediated signaling pathway (GO:0019221)	35/633	1.96E-07	8.33E-05
SRP-dependent cotranslational protein targeting to membrane (GO:0006614)	12/89	3.38E-07	0.000133
cotranslational protein targeting to membrane (GO:0006613)	12/93	5.51E-07	0.000201
nuclear-transcribed mRNA catabolic process, nonsense-mediated decay (GO:0000184)	13/112	6.46E-07	0.00022
protein targeting to ER (GO:0045047)	12/97	8.74E-07	0.000279
cellular response to interferon-gamma (GO:0071346)	13/116	9.70E-07	0.000291
interferon-gamma-mediated signaling pathway (GO:0060333)	10/70	1.89E-06	0.000536
DNA metabolic process (GO:0006259)	21/314	3.28E-06	0.00088
cellular protein metabolic process (GO:0044267)	27/484	4.30E-06	0.001098
ribosome biogenesis (GO:0042254)	17/226	6.08E-06	0.001478
mRNA processing (GO:0006397)	19/283	9.08E-06	0.002107
RNA splicing, via transesterification reactions with bulged adenosine as nucleophile (GO:0000377)	17/236	1.08E-05	0.002391
positive regulation of gene expression (GO:0010628)	35/771	1.64E-05	0.003481
cellular response to DNA damage stimulus (GO:0006974)	20/329	2.27E-05	0.004447
rRNA metabolic process (GO:0016072)	15/200	2.21E-05	0.004503
ncRNA processing (GO:0034470)	16/227	2.55E-05	0.004645
rRNA processing (GO:0006364)	15/202	2.48E-05	0.004686
ribosomal small subunit biogenesis (GO:0042274)	7/44	3.31E-05	0.005817
mRNA splicing, via spliceosome (GO:0000398)	17/261	3.93E-05	0.006681
DNA damage response, signal transduction by p53 class mediator (GO:0030330)	9/82	5.41E-05	0.008913
type I interferon signaling pathway (GO:0060337)	8/65	6.17E-05	0.009534
mRNA transport (GO:0051028)	10/104	6.62E-05	0.009645
cellular response to type I interferon (GO:0071357)	8/65	6.17E-05	0.009832
regulation of cellular response to stress (GO:0080135)	10/104	6.62E-05	0.009929
regulation of G2/M transition of mitotic cell cycle (GO:0010389)	12/149	7.32E-05	0.010092
cellular protein modification process (GO:0006464)	40/1001	7.29E-05	0.010339
regulation of mRNA stability (GO:0043488)	11/128	8.11E-05	0.010889
regulation of cell cycle process (GO:0010564)	9/90	0.000112634	0.014738
regulation of response to interferon-gamma (GO:0060330)	2/7	0.0001609	0.020527
chromatin remodeling (GO:0006338)	10/116	0.000165552	0.020605
negative regulation of DNA repair (GO:0045738)	1/2	0.0001742	0.021165
RNA metabolic process (GO:0016070)	13/191	0.000204222	0.024236
neutrophil degranulation (GO:0043312)	23/479	0.000211992	0.024586
regulation of cellular response to heat (GO:1900034)	8/78	0.000226093	0.025639
neutrophil activation involved in immune response (GO:0002283)	23/483	0.000238828	0.026494
positive regulation of cellular amide metabolic process (GO:0034250)	7/61	0.000277268	0.028298
nucleic acid metabolic process (GO:0090304)	8/80	0.00026955	0.028657
regulation of tumor necrosis factor production (GO:0032680)	7/61	0.000277268	0.028876
neutrophil mediated immunity (GO:0002446)	23/487	0.000268619	0.029165
positive regulation of viral process (GO:0048524)	6/44	0.000293528	0.02937
positive regulation of type I interferon production (GO:0032481)	7/62	0.000307005	0.030128
mitotic sister chromatid segregation (GO:0000070)	8/82	0.000319609	0.030773
positive regulation of cell cycle G2/M phase transition (GO:1902751)	4/17	0.000363958	0.034394
DNA repair (GO:0006281)	16/288	0.000405847	0.037655
positive regulation of gene expression, epigenetic (GO:0045815)	6/47	0.000423511	0.038592
negative regulation of single stranded viral RNA replication via double stranded DNA intermediate (GO:0045869)	3/8	0.000472716	0.038908
positive regulation of ryanodine-sensitive calcium-release channel activity (GO:0060316)	3/8	0.000472716	0.039545
regulation of endodeoxyribonuclease activity (GO:0032071)	3/8	0.000472716	0.040204
negative regulation of receptor activity (GO:2000272)	5/32	0.000497635	0.040308
interleukin-21-mediated signaling pathway (GO:0038114)	3/8	0.000472716	0.040886
ribonucleoprotein complex assembly (GO:0022618)	11/156	0.000460329	0.041212
cellular response to interleukin-21 (GO:0098757)	3/8	0.000472716	0.041591
negative regulation of cellular macromolecule biosynthetic process (GO:2000113)	23/512	0.000540461	0.043093
KEGG pathways
Ribosome Homo sapiens hsa03010	16/137	3.03E-08	8.88E-06
Pathogenic Escherichia coli infection Homo sapiens hsa05130	10/55	1.84E-07	2.70E-05
Herpes simplex infection Homo sapiens hsa05168	14/185	3.74E-05	0.003649
Hepatitis B Homo sapiens hsa05161	12/146	6.01E-05	0.0044
HTLV-I infection Homo sapiens hsa05166	16/258	0.000117214	0.005724
Adherens junction Homo sapiens hsa04520	8/74	0.000156288	0.006542
Viral carcinogenesis Homo sapiens hsa05203	14/205	0.000113357	0.006643
Viral myocarditis Homo sapiens hsa05416	7/59	0.000224731	0.008231
RNA transport Homo sapiens hsa03013	12/172	0.000283531	0.008307
Glucagon signaling pathway Homo sapiens hsa04922	9/101	0.000272164	0.00886
Long-term potentiation Homo sapiens hsa04720	7/66	0.000452553	0.012054
Tight junction Homo sapiens hsa04530	10/139	0.000707077	0.017264
Influenza A Homo sapiens hsa05164	11/175	0.001192719	0.024962
Antigen processing and presentation Homo sapiens hsa04612	7/77	0.001148104	0.025876
Tuberculosis Homo sapiens hsa05152	11/178	0.001367825	0.026718
Phagosome Homo sapiens hsa04145	10/154	0.001545307	0.028298
Amphetamine addiction Homo sapiens hsa05031	6/67	0.002772135	0.038678
Prostate cancer Homo sapiens hsa05215	7/89	0.002656955	0.038924
Alzheimer's disease Homo sapiens hsa05010	10/168	0.002926809	0.03898
Measles Homo sapiens hsa05162	9/136	0.002302004	0.039676
Leukocyte transendothelial migration Homo sapiens hsa04670	8/118	0.003424161	0.040131
Carbon metabolism Homo sapiens hsa01200	8/113	0.002620608	0.040413
Endocytosis Homo sapiens hsa04144	13/259	0.00335514	0.040961
p53 signaling pathway Homo sapiens hsa04115	6/69	0.003215771	0.040966
Huntington's disease Homo sapiens hsa05016	11/193	0.00258848	0.042135
