# Supplementary material for: Revisiting the Relationship Between Alzheimer’s Disease and Cancer With a circRNA Perspective
Source: Front Cell Dev Biol. 2021 Mar 11;9:647197. doi: 10.3389/fcell.2021.647197 (PMC7991802; doi:10.3389/fcell.2021.647197)
Supplement: Supplementary file 5 [file Table_5.XLSX]

## Sheet: Sheet1
Supplementary Table 8. Network parameters in circRNA-miRNA-mRNAs network
Node name	Closeness	Betweenness	BottleNeck	Stress	Degree
hsa-miR-155-5p	45.4833	3205.1	56	13278	27
circRTN4	35.9167	1384.02	20	6558	11
circMAN2A1	34.25	1160.96	28	5914	10
hsa-miR-367-3p	33.9833	931.817	9	5300	10
hsa-miR-21-5p	33.7167	883.568	4	4776	10
hsa-miR-92a-3p	33.4833	1168.97	9	3964	11
circPICALM	32.9833	495.296	24	2284	4
EEF1A1	32.45	279.764	1	1728	3
hsa-miR-205-5p	31.8667	795.262	6	3044	8
CTNNB1	31.8333	250.139	2	1514	3
RPS3	31.7833	545.4	8	1604	2
ACTB	31.1667	130.44	1	932	2
DDB1	31.1667	130.44	6	932	2
ATRIP	31.0333	129.976	5	950	2
TREX1	31.0333	129.976	1	950	2
hsa-miR-142-3p	30.8	496.237	9	2144	6
HINT1	30.65	202.897	1	974	2
ACTG1	30.5667	302.285	12	1456	3
circCORO1C	30.3333	781.31	13	3862	9
TMSB4X	30.15	122.76	1	688	2
DHX15	29.65	138.274	1	760	2
HLA-DRA	29.65	153.125	3	594	2
hsa-miR-218-5p	28.6833	225.483	15	956	2
hsa-miR-320a	28.2833	218.381	2	770	3
hsa-miR-450b-5p	27.8667	49.3395	1	488	2
RPS15	27.6	0	1	0	1
EIF3G	27.6	0	1	0	1
LCP1	27.6	0	1	0	1
RPS24	27.6	0	1	0	1
NUP205	27.6	0	1	0	1
JAK1	27.6	0	1	0	1
CFL1	27.6	0	1	0	1
RPS17	27.6	0	1	0	1
JAK2	27.6	0	1	0	1
EIF3L	27.6	0	1	0	1
SOD2	27.6	0	1	0	1
ANXA2	27.6	0	1	0	1
RPL37A	27.6	0	1	0	1
RPS4X	27.6	0	1	0	1
hsa-let-7f-5p	27.3667	156.626	2	848	3
hsa-miR-147a	27.3667	246.243	1	766	2
hsa-miR-363-3p	27.2333	57.0694	2	500	2
HSPA4	27.2167	68.9864	1	538	2
MGST1	27.2167	68.9864	1	538	2
hsa-let-7d-5p	26.7167	299.869	12	1628	4
hsa-miR-138-5p	26.55	119.499	1	572	2
PRDX1	26.4667	84.1282	1	406	2
hsa-miR-27a-3p	26.3833	137.272	2	870	3
RPS8	26	62.0923	1	342	2
HMGB1	26	62.0923	1	342	2
hsa-miR-1-3p	25.8333	58.2485	1	428	2
hsa-miR-206	25.8333	58.2485	1	428	2
hsa-miR-4428	25.8333	58.2485	1	428	2
hsa-miR-613	25.8333	58.2485	1	428	2
ZBTB34	25.7167	62.7768	1	494	2
hsa-miR-200c-3p	25.6167	49.7348	1	196	2
PTP4A1	25.4667	50.8961	1	306	2
KAZN	25.3333	48.1374	1	200	2
hsa-miR-128-3p	25.2	40.5376	2	490	2
hsa-miR-216a-3p	25.2	40.5376	1	490	2
hsa-miR-3681-3p	25.2	40.5376	1	490	2
hsa-miR-27b-3p	24.6667	62.922	1	456	2
GSTO1	24.6333	55.8418	1	266	2
circYY1AP1	24.25	124.992	1	612	5
PDCD6IP	23.0333	0	1	0	1
EIF3D	23.0333	0	1	0	1
RPL13A	22.7667	0	1	0	1
TCP1	22.7667	0	1	0	1
MVB12A	22.7667	0	1	0	1
NUP58	22.7667	0	1	0	1
PITPNA	22.7667	0	1	0	1
RPL17	22.7667	0	1	0	1
SOD1	22.2333	0	1	0	1
CDC42	22.2333	0	1	0	1
NUP93	22.2333	0	1	0	1
HNRNPA2B1	22.2333	0	1	0	1
hsa-miR-181b-5p	21.9333	160	2	572	2
RPL27	21.9	0	1	0	1
B2M	21.9	0	1	0	1
MIF	20.85	0	1	0	1
RPL41	19.75	0	1	0	1
CHMP6	17.1167	0	1	0	1
hsa-miR-6805-3p	2	2	3	2	2
circDOCK1	1.5	0	1	0	1
RPL28	1.5	0	1	0	1
Notes:Interpretations of centrality measures in network
Closeness: Closeness centrality is meant to measure one node to the others nodes’ sum distances, if the length of node N’s shortest paths with other nodes in the network is small, then node N has a high closeness centrality. It stands for the convenience and ease of connections between the focused node and the other nodes.
Betweenness: Betweenness centrality is to measure one node undertaking 'mediation' role in a network. If one node locates in the only way which others nodes have to go through, then this node should be important and very likely have a high betweenness centrality. On shortest paths of all connections in a network, the higher the betweenness centrality the more frequent this node falls between any …
BottleNeck: If node N locates more than a quarter of the shortest paths node S to other nodes, then the communication of node S with other nodes would be influenced by node N. The higher BottleNeck coefficient one node has, more other nodes in the network it would affected.
Stress: Stress coefficient is defined as the number of the shortest paths of all connections in the network one node locates in. The higher the stress coefficient the more frequent this node falls in the shortest path of any pairs of other nodes.
Degree: Degree centrality is measured by the total number of direct links with the other nodes.
