# Supplementary material for: Revisiting the Relationship Between Alzheimer’s Disease and Cancer With a circRNA Perspective
Source: Front Cell Dev Biol. 2021 Mar 11;9:647197. doi: 10.3389/fcell.2021.647197 (PMC7991802; doi:10.3389/fcell.2021.647197)
Supplement: Supplementary file 6 [file Table_6.XLSX]

## Sheet: Sheet1
Supplementary Table 2. Differentially expressed circRNAs in AD
Knight ADRC			MSBB
circRNA	log2FC	p-value	circRNA	log2FC	p-value
circCDR1-AS	0.7	0.00645	circCDR1-AS	0.7	1.16e-11
circHOMER1	-0.64	2.77e-06	circHOMER1	-0.31	1.16e-05
circST18	0.99	0.00266	circST18	0.98	3.45e-08
circMAN2A1	0.48	0.0203	circMAN2A1	0.59	4.92e-09
circRTN4	0.59	0.000274	circRTN4	0.38	2.32e-06
circPICALM	0.18	0.0463	circPICALM	0.29	1.54e-08
circMAP7	0.52	4.39e-05	circMAP7	0.31	0.000118
circCORO1C	0.42	0.000274	circKCNN2	-0.36	1.01e-08
circPDE8A	0.37	0.0463	circTTLL7	0.59	2.76e-08
circCHD9	0.2	0.0281	circCORO1C	0.31	0.000115
circICA1	-0.41	0.000781	circMLIP	-0.34	1.18e-07
circDOCK1	0.68	0.0019	circPDE8A	0.44	2.87e-07
circFMN1	-0.41	0.00174	circCHD9	0.31	1.01e-06
circPLEKHM3	-0.62	1.16e-06	circEXOSC1	0.5	3.26e-07
circLPAR1	0.5	0.0319	circICA1	-0.28	0.000375
circHNRNPM	0.7	0.00979	circATRNL1	-0.34	2.93e-06
circDGKB	-0.33	0.0103	circDOCK1	0.42	0.000309
circDNAJC6	0.45	0.0151	circFMN1	-0.29	0.000339
circELMOD3	0.58	0.0099	circPLEKHM3	-0.22	0.0246
circERBIN	0.76	0.00192	circLPAR1	0.64	1.45e-05
circUSP30	1.8	0.00174	circHNRNPM	0.73	0.0001
circFBXO7	0.32	0.0143	circDGKB	-0.24	0.000118
circRIMS1	-0.16	0.0227	circDNAJC6	0.36	8.05e-05
circVAPB	0.46	0.0142	circELMOD3	0.53	0.000152			The number of differentially expressed circRNAs used in the two datasets and the intersection among them
circSLAIN2	0.37	0.00797	circERBIN	0.43	0.000964
circWDR78	0.4	0.00263	circUSP30	1.05	0.00109
circSIRT5	-0.41	0.019	circFBXO7	0.28	0.000176
circPDE4B	-0.34	0.015	circRIMS1	-0.17	9.69e-05
circCDC14B	0.37	0.0494	circSLAIN1	0.42	1.97e-05
circBPTF	0.45	0.0431	circVAPB	0.42	0.000265
circL3MBTL4	0.4	0.0292	circSLAIN2	0.39	0.000581
circEPB41L5	-0.28	0.0223	circWDR78	0.26	0.00177
circCUL5	0.5	0.00175	circC16orf62	0.44	7.72e-07
circSH3GL3	0.45	0.0127	circSIRT5	-0.41	0.000336
circZNF430	0.39	0.0146	circAGTPBP1	0.31	8.3e-05
circSORBS1	0.75	0.0148	circPDE4B	-0.28	0.000639
circUBAP2	0.25	0.0261	circDYNC1H1	0.34	7.95e-05
circPEX6	0.54	0.0172	circKATNAL2	-0.61	2.66e-06
circYY1AP1	0.41	0.0227	circMEIS3	-0.53	3.38e-06
			circVRK2	0.63	2.89e-05
			circCDC14B	0.4	0.000378
			circATG4C	0.7	1.86e-06
			circLRRC49	-0.62	0.00022
			circUBE3A	0.32	0.00039
			circBPTF	0.53	0.000647
			circDOCK5	0.64	0.000515
			circDENND1A	-0.31	4.85e-06
			circFAT3	-0.61	8.35e-05
			circL3MBTL4	0.31	0.00136
			circST6GAL2	-0.42	0.000577
			circGPSM2	0.72	0.000595
			circEPB41L5	-0.2	0.00236
			circCUL5	0.2	0.021
			circATE1	-0.28	0.000844
			circSH3GL3	0.27	0.00538
			circPTK2	0.17	7.84e-05
			circKHDRBS3	-0.26	0.000402
			circNDST3	-0.34	0.000195
			circRAPGEF5	-0.29	0.000437
			circZNF430	0.36	0.00724
			circDGKH	-0.35	0.000342
			circFOXN2	0.81	8.84e-05
			circAASS	0.47	0.00041
			circFANCB	0.49	0.00171
			circSORBS1	0.46	0.0112
			circUSP31	0.42	0.00214
			circEP300	0.88	0.000229
			circPTPRN2	-0.71	0.00265
			circUBAP2	0.2	0.00717
			circKCNMA1	-0.47	0.000513
			circPEX6	0.42	0.012
			circDGKI	-0.32	0.000242
			circFANCL	0.32	0.00186
			circYY1AP1	0.28	0.0106
			circCTNNA3	1.06	0.00127
Note: Shadowed circRNAs indicate those significantly associated with all of the three traits (DE, Braak score, and CDR).
