# Supplementary material for: Revisiting the Relationship Between Alzheimer’s Disease and Cancer With a circRNA Perspective
Source: Front Cell Dev Biol. 2021 Mar 11;9:647197. doi: 10.3389/fcell.2021.647197 (PMC7991802; doi:10.3389/fcell.2021.647197)
Supplement: Supplementary file 8 [file Table_8.XLSX]

## Sheet: Sheet1
Supplementary Table 4. Clinical Dementia Rating (CDR) associated circRNAs in AD
Knight ADRC			MSBB
circRNA	log2FC	p-value	circRNA	log2FC	p-value
circHOMER1	-0.28	8.22e-12	circKCNN2	-0.12	1.93e-09
circPLEKHM3	-0.19	6.13e-06	circHOMER1	-0.13	2.27e-09
circDOCK1	0.3	8.49e-06	circEXOSC1	0.18	8.13e-09
circVCAN	0.28	1.32e-05	circATRNL1	-0.13	4.15e-08
circMAP7	0.17	1.83e-05	circCDR1-AS	0.19	4.9e-08
circICA1	-0.16	7.4e-05	circDOCK1	0.2	7.55e-08
circFMN1	-0.16	0.000101	circDGKI	-0.14	2.42e-07
circST18	0.37	0.000127	circRTN4	0.13	2.72e-07
circMAN2A1	0.23	0.000246	circMAN2A1	0.17	2.92e-07
circCDYL	-0.12	0.000324	circRP1-73A14.1	0.35	4.82e-07
circCUL5	0.18	0.000351	circKATNAL2	-0.21	5.78e-07
circSOBP	-0.1	0.000376	circST18	0.28	6.6e-07
circDGKB	-0.13	0.000413	circFANCL	0.15	9.88e-07
circYY1AP1	0.2	0.000447	circHNRNPM	0.28	1.96e-06
circSLAIN2	0.14	0.000525	circADGRB3	-0.07	2.2e-06
circNDST3	-0.19	0.000581	circMLIP	-0.1	3.41e-06
circWDR78	0.14	0.000584	circTTLL7	0.16	3.42e-06
circMVB12B	0.21	0.000619	circST6GAL2	-0.18	3.71e-06
circNEBL	-0.19	0.000674	circPICALM	0.08	4.63e-06
circCORO1C	0.12	0.000719	circEPB41L5	-0.09	1.02e-05
circKCNN2	-0.12	0.000727	circVAPB	0.16	1.08e-05
circPHC3	0.16	0.000743	circLPAR1	0.2	1.72e-05
circRIMS1	-0.07	0.00103	circPDE4B	-0.11	1.98e-05			The number of circRNAs associated with CDR score in the two datasets and the intersection among them
circEPB41L5	-0.13	0.00112	circSLC39A10	-0.21	2.01e-05
circERBIN	0.25	0.00134	circFMN1	-0.11	2.13e-05
circSPPL3	0.17	0.00138	circCORO1C	0.11	2.2e-05
circSPHKAP	-0.39	0.00148	circICA1	-0.11	2.33e-05
circZNF91	-0.24	0.00148	circCSMD3	-0.16	2.73e-05
circUBAP2	0.11	0.00161	circERBIN	0.17	2.92e-05
circSORBS1	0.28	0.00233	circDOCK5	0.24	2.96e-05
circATRNL1	-0.13	0.00242	circFAT3	-0.21	3.11e-05
circTTLL7	0.18	0.00259	circRNASEH2B	0.14	3.13e-05
circMED13	0.25	0.00299	circWDR78	0.11	3.59e-05
circRNASEH2B	0.2	0.00357	circZC3H6	0.13	3.89e-05
circFRYL	0.3	0.00417	circUNC13C	-0.21	4.59e-05
circFAT3	-0.23	0.00475	circC16orf62	0.12	4.6e-05
circMTUS1	0.27	0.00532	circUBE3A	0.12	5.87e-05
circFER	-0.21	0.00554	circSLC8A3	-0.26	6.18e-05
circMBOAT2	0.13	0.00563	circSLC8A1	-0.11	7.36e-05
circPDE4B	-0.13	0.00584	circBAZ2B	-0.2	7.48e-05
circSH3GL3	0.15	0.00609	circMAN1A2	-0.05	8.22e-05
circDNAJC6	0.16	0.00663	circCOL4A5	0.31	9.16e-05
circPTPN13	0.16	0.00687	circZBED3-AS1	0.29	9.89e-05
circSLAIN1	0.17	0.00754	circPDE8A	0.11	0.000118
circZNF148	-0.11	0.00827	circDNAJC6	0.11	0.000127
circRTN4	0.14	0.00836	circPHC3	0.11	0.00014
circKLHL8	-0.09	0.00847	circTOP1	0.13	0.000159
circFANCL	0.21	0.00912	circL3MBTL4	0.12	0.000163
circZNF430	0.14	0.00963	circMAP7	0.1	0.000166
circADGRB3	-0.07	0.011	circMEIS3	-0.14	0.000217
circIQCK	0.17	0.011	circBPTF	0.18	0.00027
circNARS2	0.16	0.0118	circDGKH	-0.12	0.000272
circEGLN3	0.24	0.0119	circPROSC	0.13	0.000272
circFBXO7	0.11	0.0121	circEGLN3	0.24	0.000285
circPICALM	0.07	0.0129	circSPHKAP	-0.27	0.000316
circPDE8A	0.15	0.0133	circFANCB	0.18	0.00033
circAUTS2	0.17	0.0145	circURI1	0.14	0.000357
circGRIN2B	-0.29	0.0149	circREPS2	0.09	0.000362
circCDC14B	0.15	0.0154	circRP11-1023L17.1	0.21	0.000422
circREXO4	0.21	0.0154	circSLAIN1	0.11	0.000425
circNRXN1	-0.11	0.0157	circTASP1	-0.11	0.000429
circSENP6	0.18	0.0178	circSV2B	-0.11	0.000456
circREPS2	0.12	0.0188	circUSP54	0.12	0.000487
circTERF2	0.12	0.0188	circLRRC49	-0.19	0.000502
circLIFR	0.09	0.0193	circEDIL3	0.14	0.000509
circMAPK4	-0.25	0.0215	circLY86-AS1	-0.11	0.000549
circLPAR1	0.17	0.0217	circSLAIN2	0.12	0.000562
circL3MBTL4	0.13	0.0221	circPTK2	0.05	0.000588
circSLCO1A2	0.26	0.0221	circCCDC66	0.11	0.000633
circUBE3A	0.12	0.0223	circKDM8	0.15	0.000668
circC1orf27	0.32	0.0227	circCCSER1	-0.13	0.000676
circLRRC7	-0.12	0.0235	circAP3B1	0.18	0.000678
circLMTK2	-0.14	0.0235	circRSRC1	0.1	0.000678
circKATNAL2	-0.14	0.0239	circKCNH8	0.2	0.000708
circATXN7	-0.14	0.0243	circRAPGEF5	-0.09	0.000806
circUSP54	0.16	0.0257	circRHBDD1	0.09	0.000825
circWDR49	0.17	0.0265	circGRHPR	0.1	0.000889
circHDAC9	-0.14	0.0278	circMAML2	0.34	0.000905
circURI1	0.19	0.0287	circEP300	0.25	0.000943
circMAN1A2	-0.06	0.0313	circZNF430	0.14	0.000951
circCDR1-AS	0.17	0.0318	circYY1AP1	0.11	0.000971
circCEP85L	-0.17	0.033	circSLCO1A2	0.19	0.000993
circATE1	-0.11	0.0331	circPLEKHM3	-0.1	0.001
circEML2	0.23	0.0337	circCADPS	-0.12	0.00108
circRAPGEF5	-0.1	0.034	circFOXN2	0.21	0.00108
circSLC8A1	-0.1	0.0345	circCEP85L	-0.21	0.00111
circBAZ2B	-0.32	0.035	circZNF148	-0.09	0.00116
circEXOSC1	0.14	0.0366	circNOL4	-0.14	0.00123
circDGKI	-0.12	0.0386	circKLHDC1	0.12	0.00125
circDOCK5	0.23	0.0386	circPHIP	0.11	0.00128
circBPTF	0.14	0.0389	circFRYL	0.2	0.00143
circFSIP1	-0.17	0.0392	circMAPK4	-0.2	0.00175
circTBC1D12	0.14	0.042	circLPXN	-0.08	0.00181
circCUX1	0.15	0.0432	circMBTD1	0.18	0.00211
circSLC45A4	-0.06	0.0443	circSFMBT2	0.07	0.00224
			circDEK	0.11	0.00234
			circSLC45A4	-0.07	0.00238
			circCDYL	-0.07	0.00277
			circCDC14B	0.11	0.00282
			circSH3GL3	0.09	0.00315
			circTMEM132D	-0.1	0.00323
			circSSX2IP	-0.17	0.0037
			circFBXL17	-0.07	0.00374
			circUBXN2A	0.1	0.00391
			circGRIN2B	-0.19	0.00395
			circDGKB	-0.06	0.00398
			circAUTS2	0.18	0.00402
			circMBOAT2	0.07	0.00417
			circSIRT5	-0.11	0.0045
			circSENP6	0.11	0.00452
			circASXL1	0.11	0.00457
			circATE1	-0.08	0.00464
			circRIMS2	-0.06	0.00468
			circUBAP2	0.07	0.00489
			circTERF2	0.11	0.00527
			circIQCK	0.14	0.00545
			circSTXBP5L	-0.06	0.00581
			circRIMS1	-0.04	0.00605
			circCUX1	0.14	0.00606
			circHDAC9	-0.12	0.00618
			circLRRC7	-0.08	0.00625
			circEML2	0.23	0.00627
			circZNF91	-0.11	0.00628
			circELMOD3	0.12	0.00636
			circFBXO7	0.07	0.00651
			circTBC1D12	0.11	0.00842
			circNDST3	-0.08	0.00847
			circLIFR	0.07	0.0088
			circPTPN13	0.09	0.00887
			circMVB12B	0.08	0.00942
			circMTUS1	0.12	0.00968
			circSORBS1	0.15	0.0104
			circLMTK2	-0.09	0.0107
			circFSIP1	-0.11	0.0116
			circATXN7	-0.13	0.0117
			circWDR49	0.17	0.0132
			circKLHL8	-0.06	0.0137
			circC1orf27	0.19	0.0155
			circMED13	0.09	0.0187
			circCUL5	0.07	0.0211
			circNRXN1	-0.07	0.0213
			circREXO4	0.11	0.0224
			circSPPL3	0.08	0.0237
			circFER	-0.08	0.0238
			circNARS2	0.09	0.0291
			circNEBL	-0.08	0.0365
			circSOBP	-0.05	0.0403
